# Supplementary material for: Metabolism of the crucifer phytoalexins wasalexin A and B in the plant pathogenic fungus Leptosphaeria maculans
Source: Royal Society of Chemistry journal article supplement (doi:10.1039/b609367a), 2006-01-01

**Supplementary information:  $^1\text{H}$  NMR of new compounds for  
proof of purity**

**For manuscript entitled:**

**Metabolism of the crucifer phytoalexins wasalexins A and B in the plant  
pathogenic fungus *Leptosphaeria maculans***

M. Soledade C. Pedras\* and Mojmír Suchý

Department of Chemistry, University of Saskatchewan, 110 Science Place,  
Saskatoon, SK, S7N 5C9, Canada

Corresponding author:  
M. Soledade C. Pedras\*  
Email: s.pedras@usask.ca;  
telephone: 1-(306) 966-4772;  
fax: 1-(306) 966-4730

# Dihydrowasalexin (7)

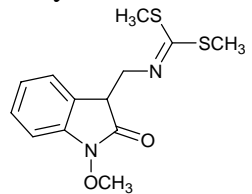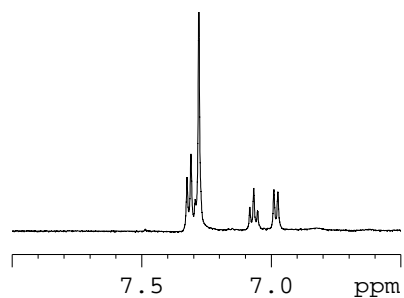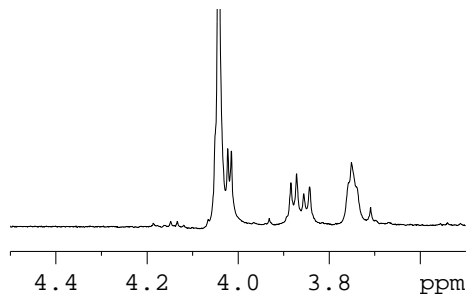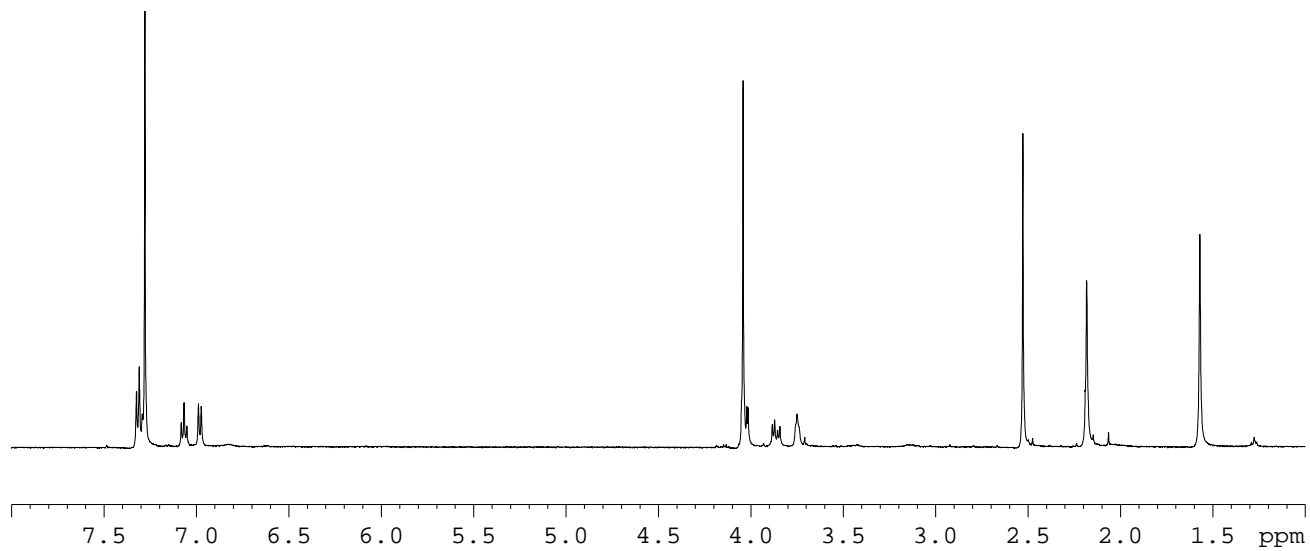

1-Methoxy-3-methylindole-2-one (8)

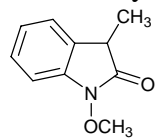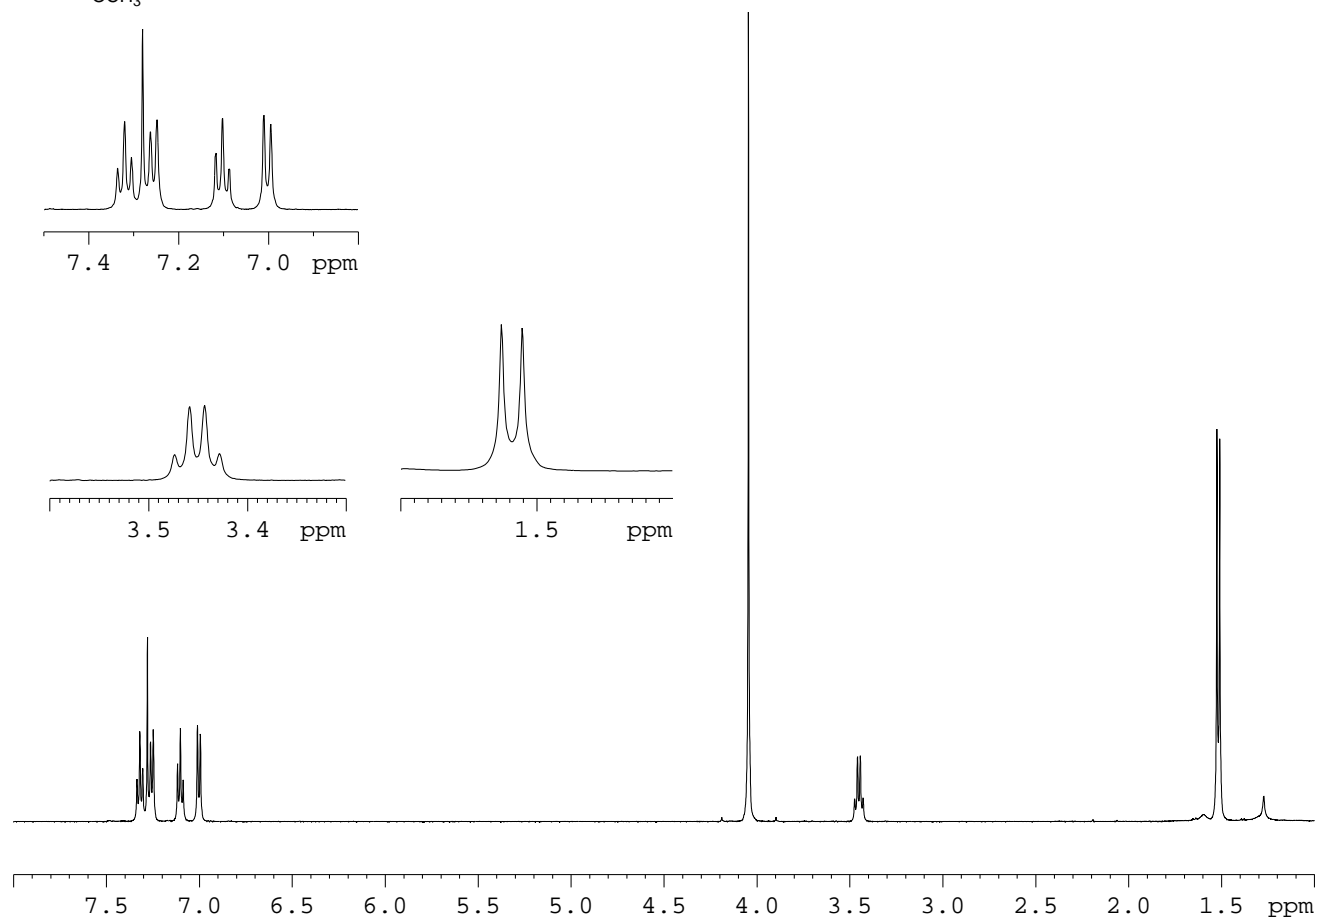

1-Methoxy-3-methylsulfanylmethylindole-2-one (9)

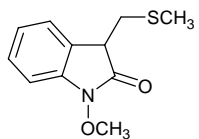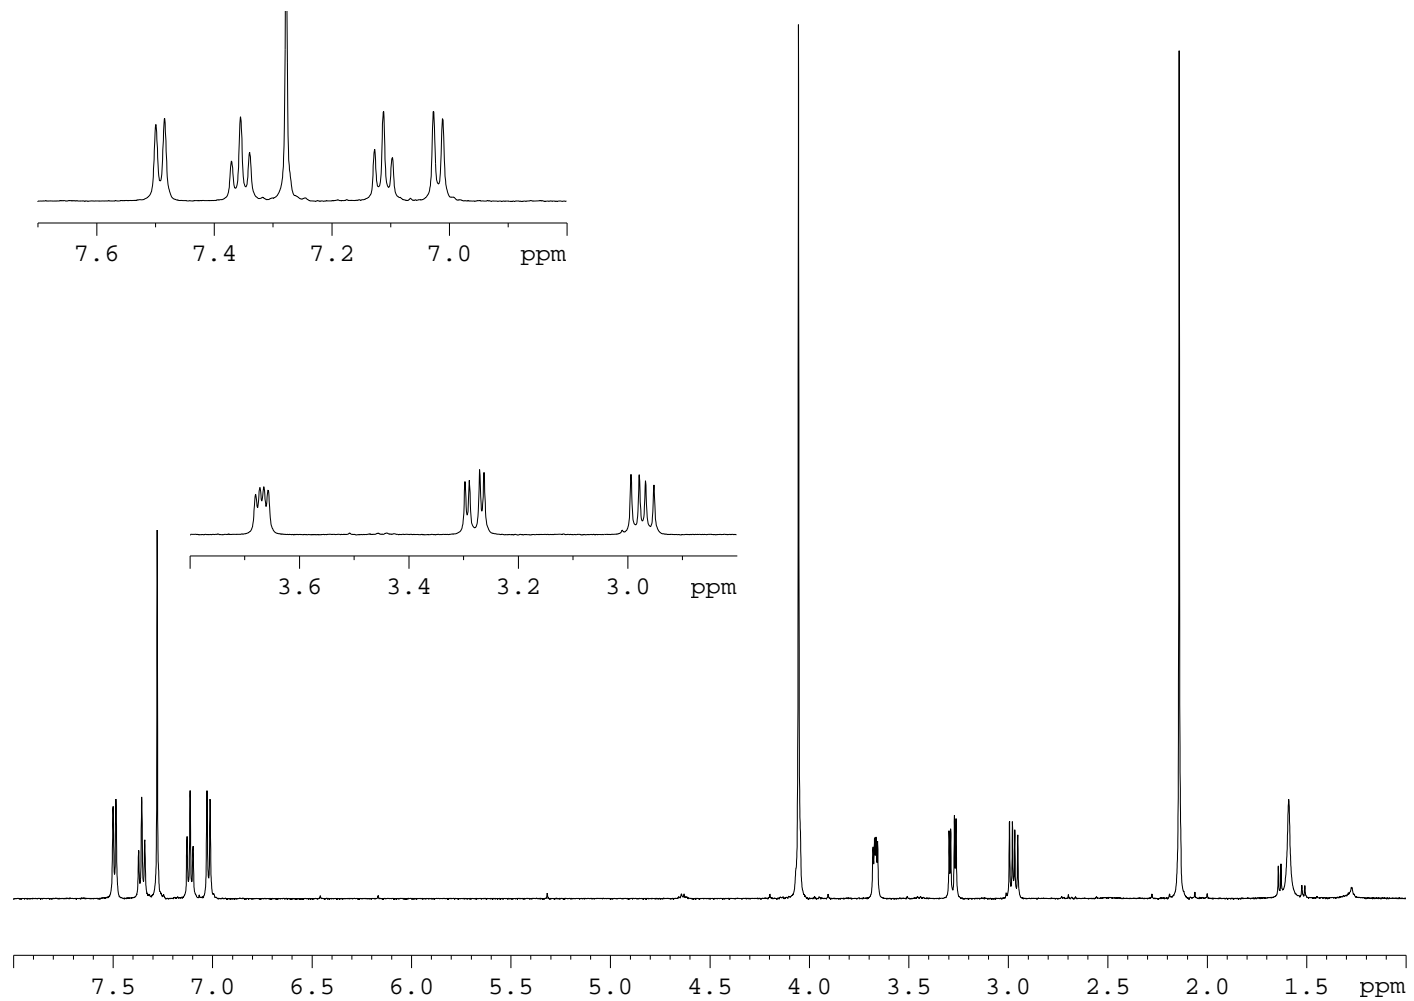

*S*-Methyl 1-methoxy-3-aminomethylene-2-oxindole thiocarbamate (**10**)

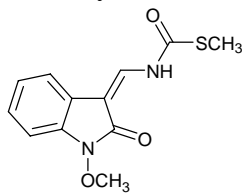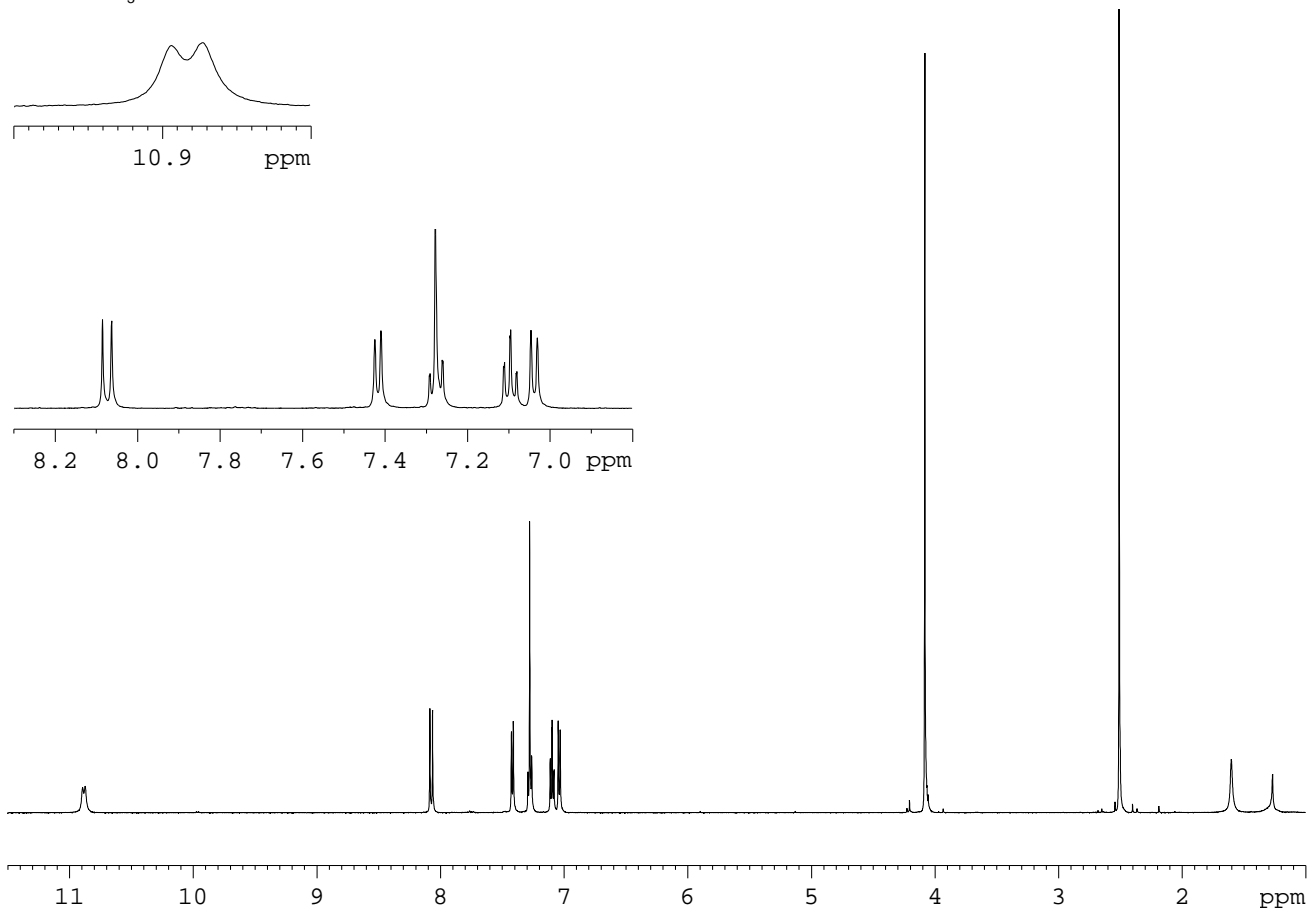

*S*-Methyl 1-methoxy-3-aminomethyl-2-oxindole thiocarbamate (**11**)

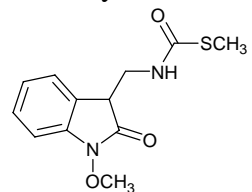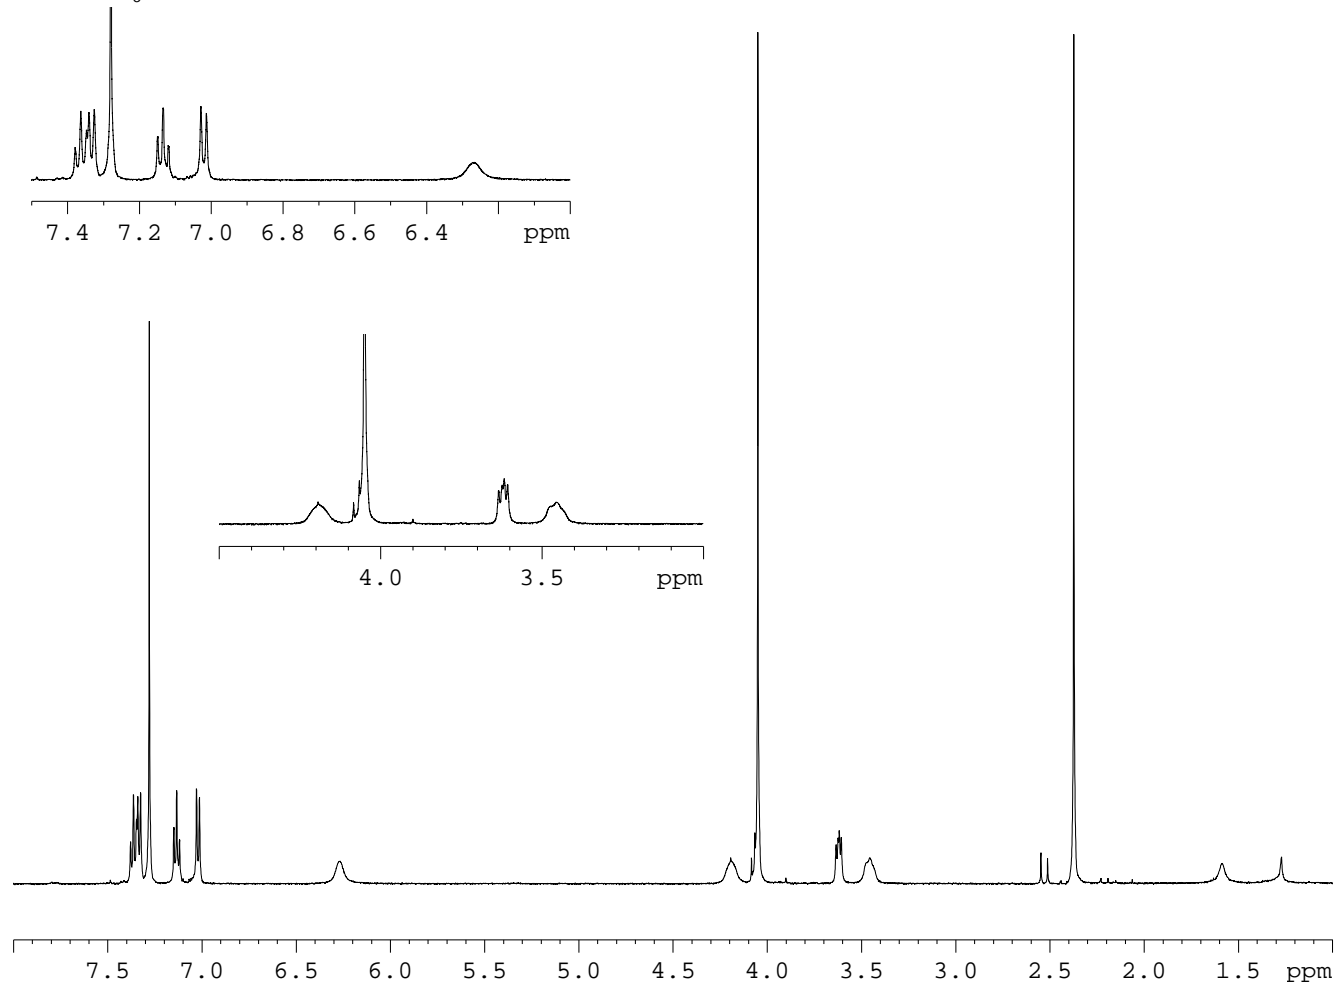

*S*-Methyl 1-methoxy-3-aminomethyl-2-oxindole dithiocarbamate (**14**)

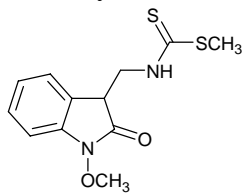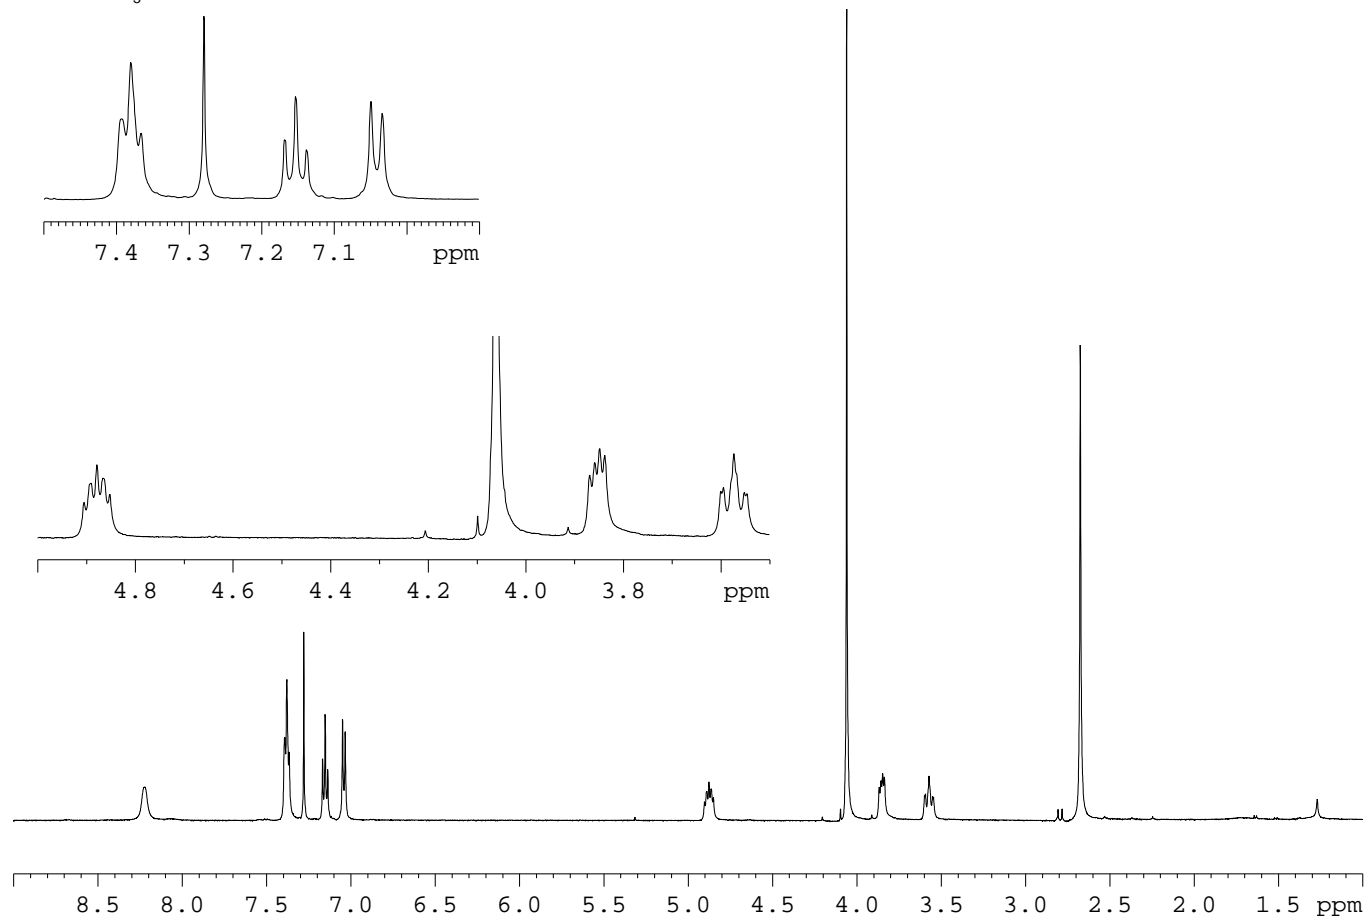

*S*-Ethyl-*S*-methyl 1-methoxy-3-aminomethyl-2-oxindole iminodithioate (**16**)

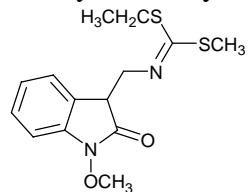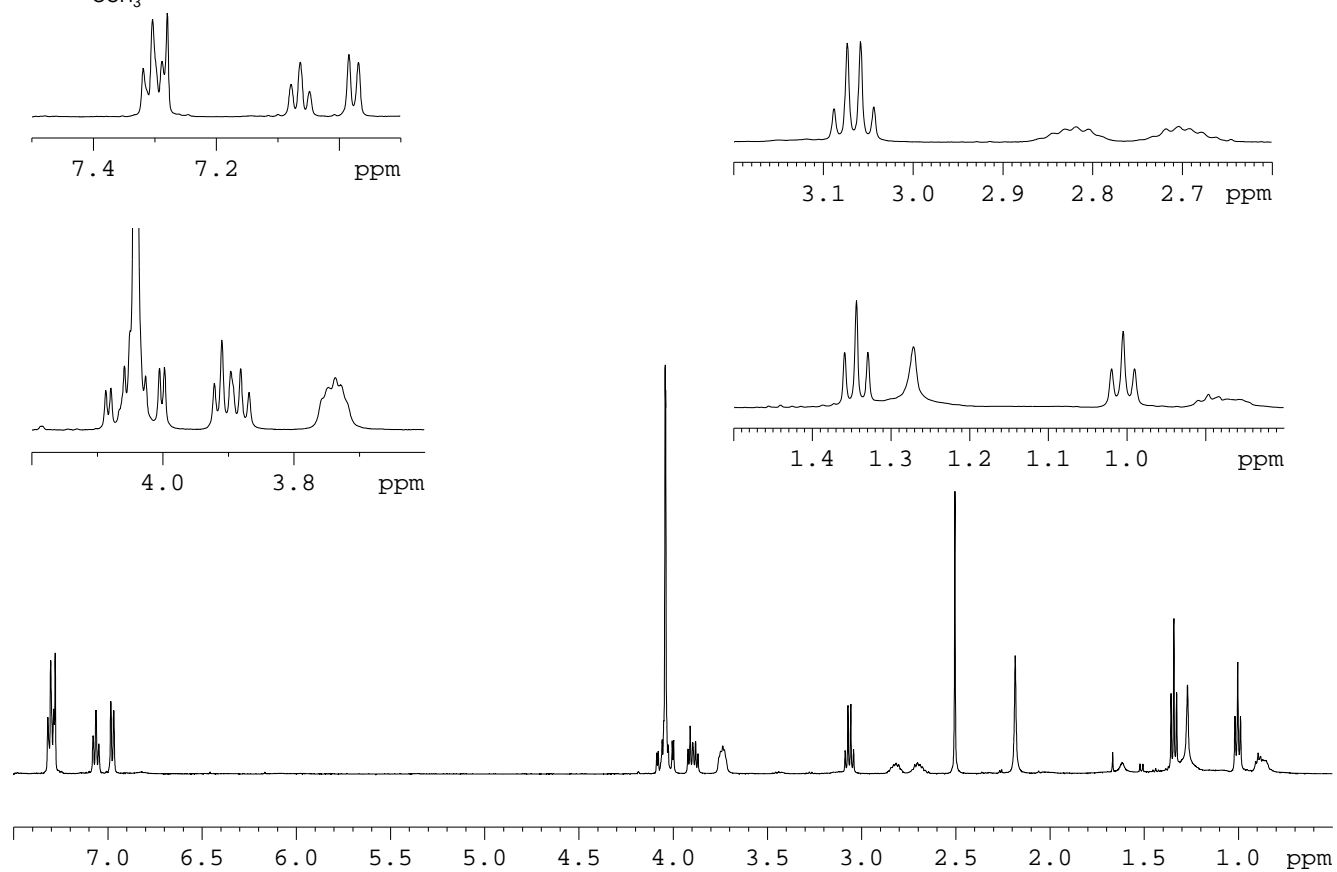



*S,S*-Diethyl methoxy-3-aminomethyl-2-oxindole iminodithioate (**17**)

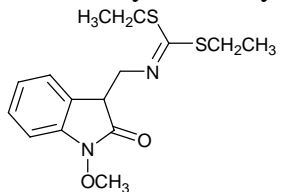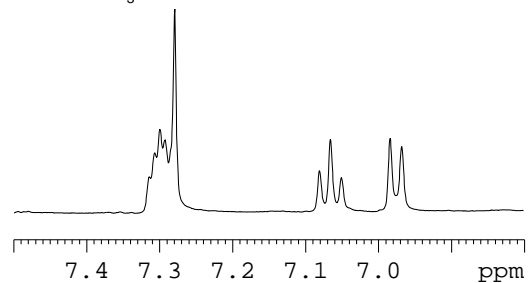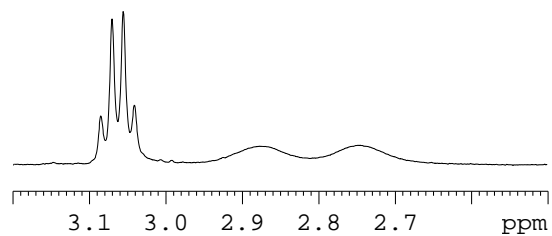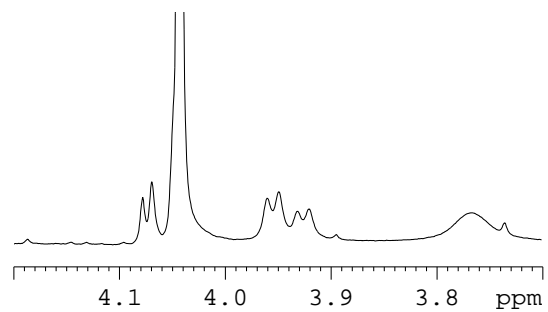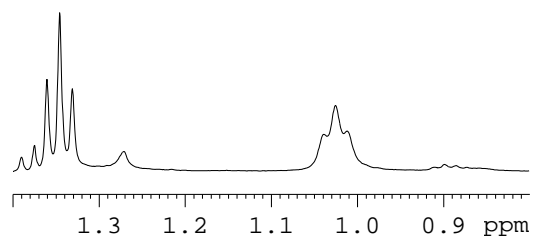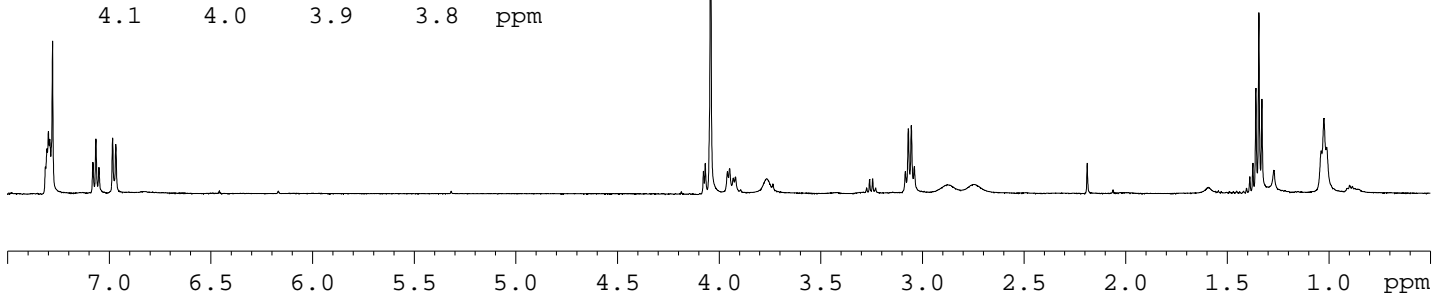

1-Methoxy-3-ethylsulfanylmethylindole-2-one (**18**)

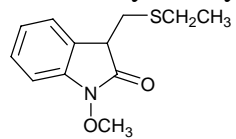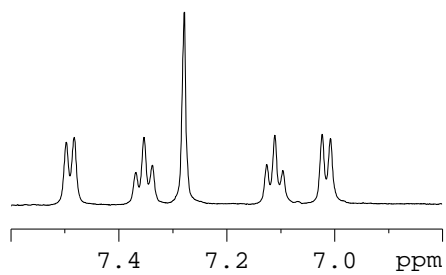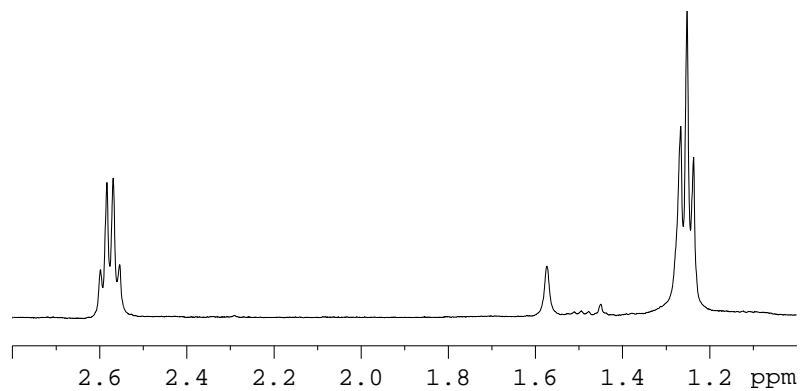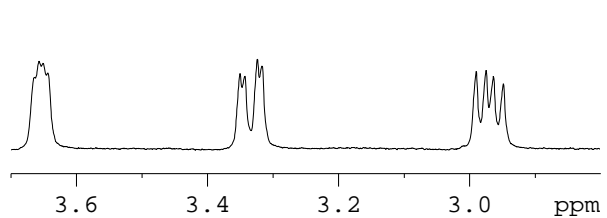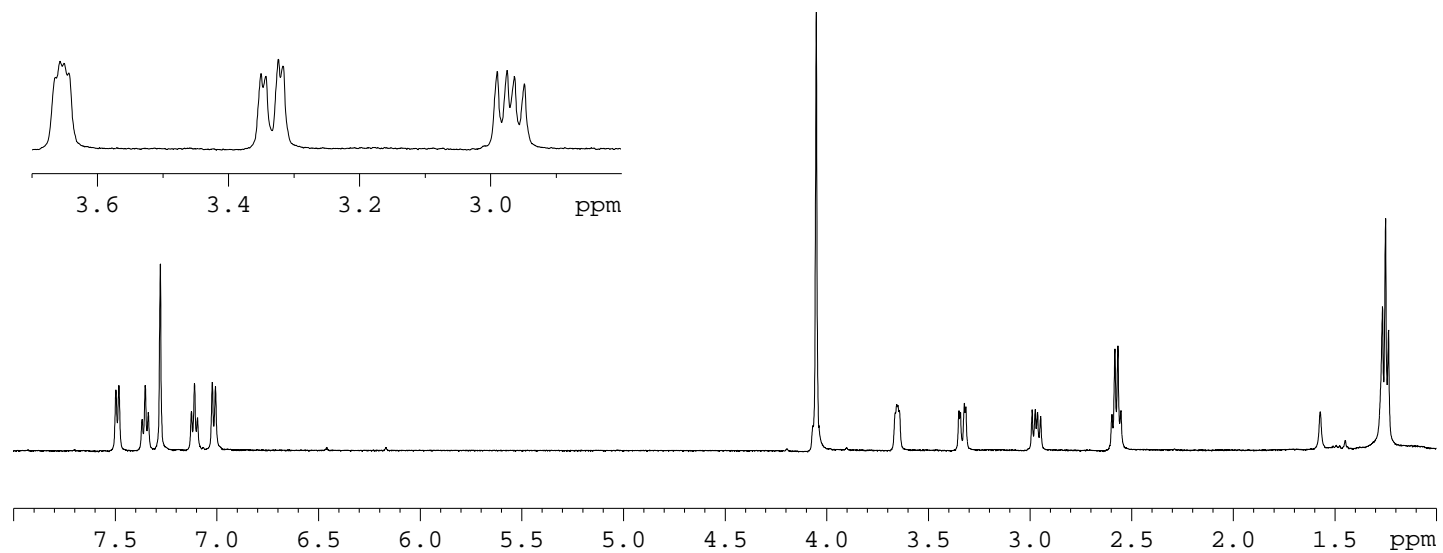

S-Ethyl 1-methoxy-3-aminomethylene-2-oxindole dithiocarbamate (**20**)

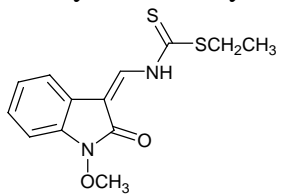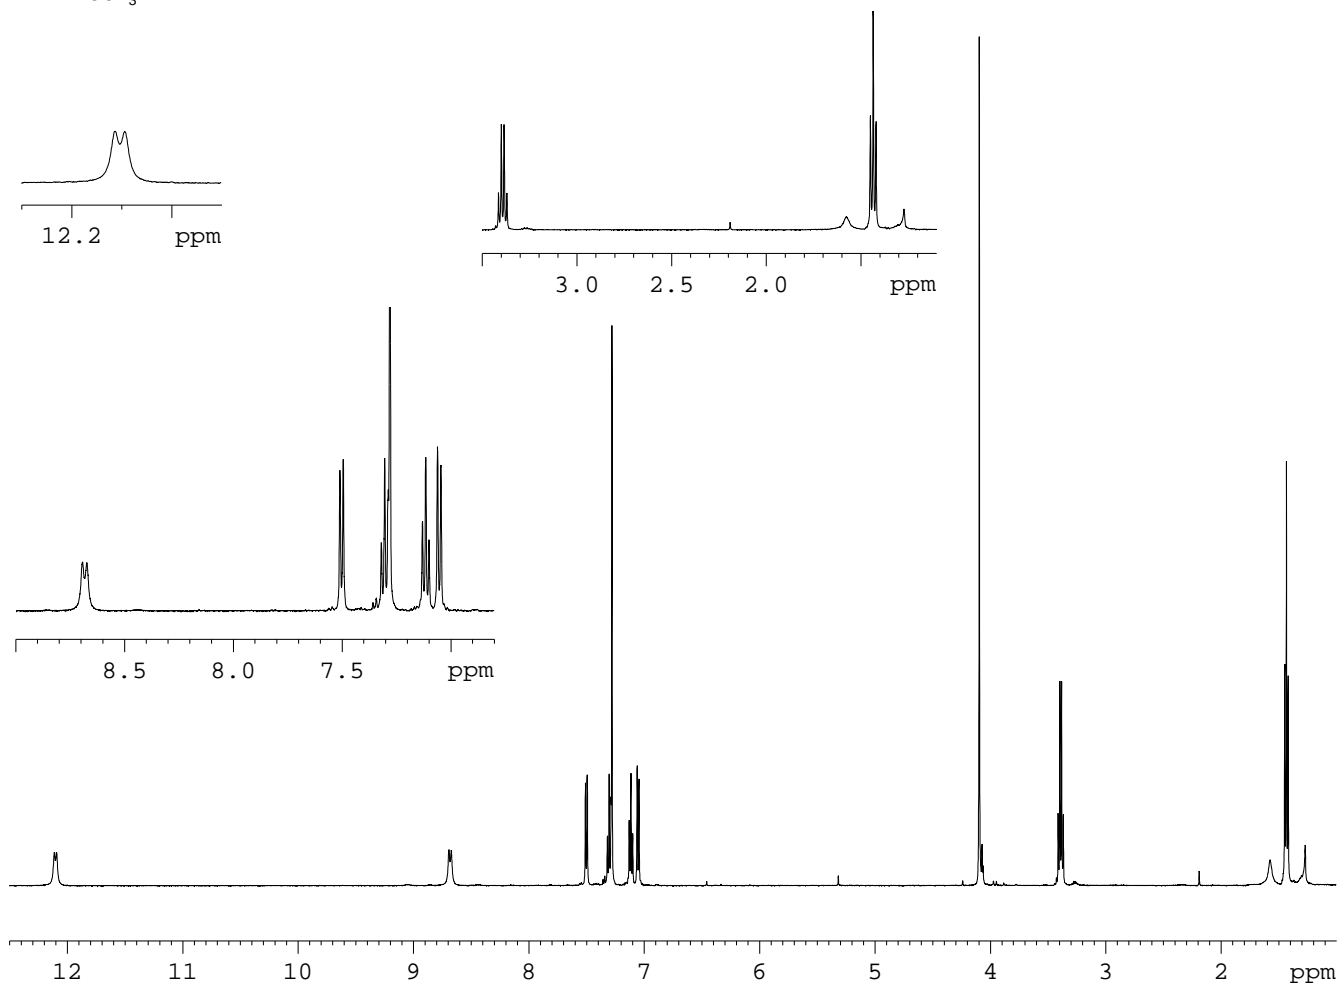

S-Ethyl 1-methoxy-3-aminomethyl-2-oxindole dithiocarbamate (**25**)

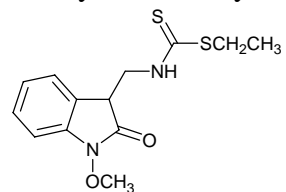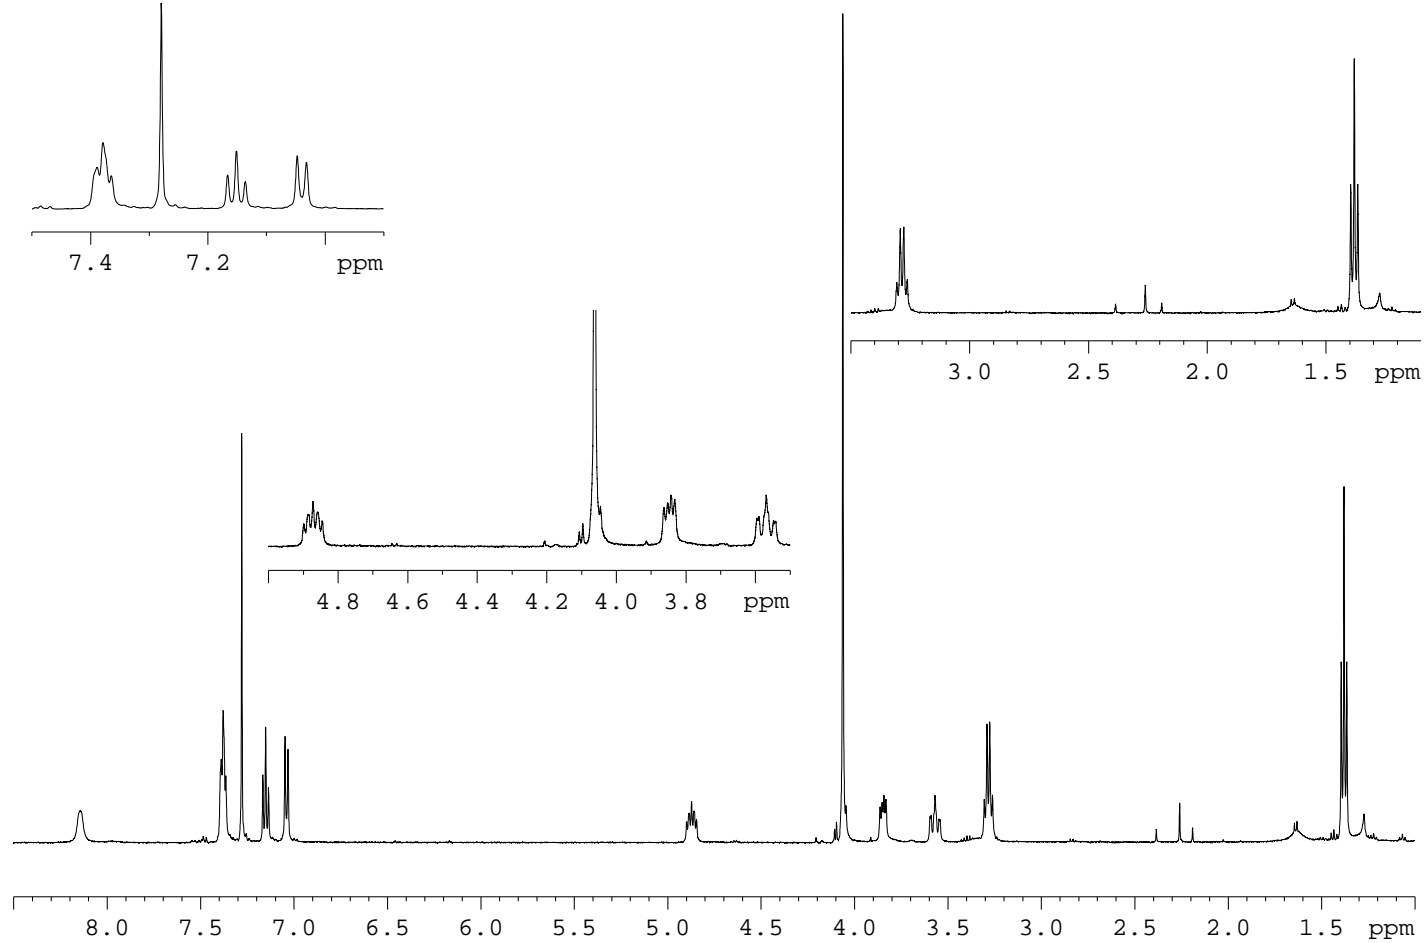

Supplement: b609367a.pdf [file b609367a.pdf]
